# Supplementary material for: The Robustness of a Signaling Complex to Domain Rearrangements Facilitates Network Evolution
Source: PLoS Biol. 2014 Dec 9;12(12):e1002012. doi: 10.1371/journal.pbio.1002012 (PMC4260825; doi:10.1371/journal.pbio.1002012)
Supplement: Data S2 — Data shown in Figures S6–S8, S10, and S13. (XLSX) [file pbio.1002012.s018.xlsx]

## Sheet: Data Fig S6 S7
	Maya12 = alpha strain	Libraries in "a strains"
		Mating Efficiency	Error	Strain & Variant
	maya12 + Ste18KO	0	0	Ste18KO
	maya12 + 42-18	1.059	0.277	Cdc42[N]-Ste18[C]
	maya12 + 20-18	0.099	0.028	Ste20[N]-Ste18[C]
	maya12 + 11-18	0.0015	0.0005	Ste11[N]-Ste18[C]
	maya12 + 7-18	0.298	0.035	Ste7[N]-Ste18[C]
	maya12 + Ste4KO	0	0	Ste4KO
	maya12 + 4-Gpa	0.079	0.061	Ste4[N]-GpaI[C]
	maya12 + 4-5	0.0947	0.0703	Ste4[N]-Ste5[C]
	maya12 + 4-50	0.506	0.112	Ste4[N]-Ste50[C]
	maya12 + 4-20	0.20935	0.14265	Ste4[N]-Ste20[C]
	maya12 + 4-7	0.4485	0.1925	Ste4[N]-Ste7[C]
	maya12 + Ste50KO	0.128415	0.064115	Ste50KO
	maya12 + 50-Gpa	0.036925	0.015875	Ste50[N]-GpaI[C]
	maya12 + 50-5	0.243115	0.079115	Ste50[N]-Ste5[C]
	maya12 + 50-11	0.78165	0.14995	Ste50[N]-Ste11[C]
	maya12 + 50-7	1.437	0.261	Ste50[N]-Ste7[C]
	maya12 +50-3	0.5992	0.2558	Ste50[N]-Fus3[C]
	maya12 + 4-50	0.37566	0.10566	Ste4[N]-Ste50[C]
	maya12 + Ste20KO	0	0	Ste20KO
	maya12 + 5-20	0.77	0.46	Ste5[N]-Ste20[C]
	maya12 + 50-20	1.571	1.152	Ste504[N]-Ste20[C]
	maya12 + 42-20	0	0	Cdc42[N]-Ste20[C]
	maya12 + 24-20	0.0875	0.0875	Cdc24[N]-Ste20[C]
	maya12 + 4-20	1.5325	0.6035	Ste4[N]-Ste20[C]
	maya12 + 11-20	1.068	0.523	Ste11[N]-Ste20[C]
	maya12 + 7-20	0.2045	0.0515	Ste7[N]-Ste20[C]
	maya12 + 20-11	0.044	0.02	Ste20[N]-Ste11[C]
	maya12 + 20-7	0.1615	0.1065	Ste20[N]-Ste7[C]
	maya12 + Ste11KO	0	0	Ste11KO
	maya12 + 5-11	1.6605	1.0285	Ste5[N]-Ste11[C]
	maya12 + 50-11	0.0145	0.0065	Ste50[N]-Ste11[C]
	maya12 + 42-11	1.704	1.444	Cdc42[N]-Ste11[C]
	maya12 + 20-11	2.4905	1.5415	Ste20[N]-Ste11[C]
	maya12 + 7-11	0.6495	0.3995	Ste7[N]-Ste11[C]
	maya12 + Ste7KO	0	0	Ste7KO
	maya12 + 5-7	0	0	Ste5[N]-Ste7[C]
	maya12 + 50-7	1.059	0.281	Ste50[N]-Ste7[C]
	maya12 + 42-7	0.0993	0.0277	Cdc42[N]-Ste7[C]
	maya12 + 4-7	0.2995	0.0355	Ste4[N]-Ste7[C]
	maya12 + 11-7	0	0	Ste11[N]-Ste7[C]

## Sheet: Data Fig S8
Ste50KO	OD & time
	1	2	3	4	5	6	7	8
wt	0.108	0.105	0.144	0.178	0.24	0.32	0.428	0.593
	0.092	0.121	0.155	0.189	0.258	0.34	0.443	0.592
	0.098	0.114	0.223	0.182	0.25	0.395	0.456	0.608
average	0.0993333	0.113333	0.174	0.183	0.249333	0.351667	0.442333	0.597667
Stdev	0.00659966	0.00654896	0.034938	0.00454606	0.00736357	0.0317105	0.0114407	0.00731817
Ste50KO	0.191	0.252	0.381	0.555	0.889	1.263	1.44	1.97
	0.185	0.248	0.373	0.54	0.881	1.23	1.462	1.993
	0.215	0.284	0.424	0.593	0.942	1.289	1.511	1.985
average	0.197	0.261333	0.392667	0.562667	0.904	1.26067	1.471	1.98267
Stdev	0.0129615	0.0161107	0.0223954	0.022306	0.0270678	0.0241431	0.029676	0.00953357
42-50	0.182	0.249	0.367	0.533	0.852	1.2	1.544	1.938
	0.164	0.238	0.372	0.537	0.853	1.223	1.551	1.942
	0.162	0.227	0.365	0.537	0.869	1.197	1.54	1.94
average	0.169333	0.238	0.368	0.535667	0.858	1.20667	1.545	1.94
Stdev	0.00899383	0.00898146	0.00294392	0.00188562	0.00778888	0.0116142	0.00454606	0.00163299
50-11	0.158	0.223	0.328	0.472	0.764	1.11	1.46	1.788
	0.181	0.213	0.323	0.487	0.76	1.111	1.44	1.785
	0.153	0.215	0.336	0.48	0.745	1.123	1.45	1.794
average	0.164	0.217	0.329	0.479667	0.756333	1.11467	1.45	1.789
Stdev	0.0121929	0.00432049	0.00535413	0.00612826	0.00817856	0.00590668	0.00816497	0.00374166
50-7	0.116	0.197	0.287	0.44	0.7	1.073	1.432	1.847
	0.141	0.2	0.314	0.456	0.728	1.094	1.44	1.834
	0.144	0.201	0.31	0.464	0.756	1.045	1.465	1.842
average	0.133667	0.199333	0.303667	0.453333	0.728	1.07067	1.44567	1.841
Stdev	0.0125521	0.00169967	0.0118977	0.00997775	0.0228619	0.0200721	0.0140554	0.00535413
Ste18KO	OD & Time
	1	2	3	4	5	6	7	8
WT	0.119	0.192	0.164	0.249	0.268	0.372	0.476	0.62
	0.166	0.188	0.16	0.209	0.251	0.376	0.493	0.642
	0.082	0.113	0.154	0.219	0.283	0.383	0.497	0.659
average	0.122333	0.164333	0.159333	0.225667	0.267333	0.377	0.488667	0.640333
StDev	0.0343738	0.0363349	0.00410961	0.0169967	0.0130724	0.00454606	0.00910433	0.0159652
Ste18KO	0.146	0.2	0.317	0.497	0.728	1.063	1.43	1.785
	0.177	0.265	0.32	0.497	0.734	1.041	1.342	1.721
	0.135	0.203	0.309	0.509	0.753	1.046	1.397	1.734
average	0.152667	0.222667	0.315333	0.501	0.738333	1.05	1.38967	1.74667
StDev	0.0177826	0.0299592	0.0046428	0.00565685	0.0106562	0.0094163	0.0362981	0.0276204
42-18	0.169	0.233	0.395	0.353	0.57	0.834	1.162	1.478
	0.174	0.226	0.358	0.337	0.544	0.772	1.101	1.42
	0.14	0.251	0.33	0.362	0.518	0.81	1.12	1.469
average	0.161	0.236667	0.361	0.350667	0.544	0.805333	1.12767	1.45567
StDev	0.0149889	0.0105304	0.0266208	0.0103387	0.0212289	0.0255256	0.0254864	0.0254864
Ste11KO	OD & Time
	1	2	3	4	5	6	7	8
wt	0.135	0.133	0.133	0.211	0.295	0.369	0.487	0.608
	0.113	0.126	0.142	0.196	0.288	0.353	0.455	0.584
	0.101	0.13	0.138	0.199	0.273	0.351	0.459	0.569
average	0.116333	0.129667	0.137667	0.202	0.285333	0.357667	0.467	0.587
stdev	0.0140791	0.00286744	0.00368179	0.00648074	0.00917727	0.00805536	0.0142361	0.0160624
Ste11KO	0.221	0.24	0.286	0.538	0.858	1.118	1.446	1.734
	0.201	0.227	0.252	0.498	0.84	1.1	1.406	1.718
	0.194	0.224	0.255	0.49	0.84	1.1	1.425	1.717
average	0.205333	0.230333	0.264333	0.508667	0.846	1.106	1.42567	1.723
stdev	0.0114407	0.00694422	0.0153695	0.0209974	0.00848528	0.00848528	0.0163367	0.00778888
20-11	0.18	0.182	0.194	0.3	0.537	0.759	1.054	1.36
	0.211	0.196	0.188	0.325	0.543	0.722	1.037	1.326
	0.184	0.178	0.186	0.308	0.553	0.74	1	1.29
average	0.191667	0.185333	0.189333	0.311	0.544333	0.740333	1.03033	1.32533
stdev	0.0137679	0.00771722	0.00339935	0.0104243	0.00659966	0.015107	0.0225438	0.0285813
5-11	0.225	0.236	0.263	0.488	0.768	0.99	1.36	1.582
	0.246	0.248	0.292	0.461	0.708	1.039	1.353	1.607
	0.384	0.263	0.278	0.452	0.773	1.011	1.33	1.582
average	0.285	0.249	0.277667	0.467	0.749667	1.01333	1.34767	1.59033
stdev	0.0705266	0.0110454	0.0118415	0.0152971	0.0295334	0.0200721	0.0128149	0.0117851
Ste20KO	OD & Time
	1	2	3	4	5	6	7	8
wt	0.135	0.133	0.133	0.211	0.295	0.369	0.487	0.608
	0.113	0.126	0.142	0.196	0.288	0.353	0.455	0.584
	0.101	0.13	0.138	0.199	0.273	0.351	0.459	0.569
average	0.116333	0.129667	0.137667	0.202	0.285333	0.357667	0.467	0.587
stdev	0.0140791	0.00286744	0.00368179	0.00648074	0.00917727	0.00805536	0.0142361	0.0160624
Ste20KO	0.238	0.25	0.237	0.455	0.779	1.058	1.411	1.724
	0.194	0.275	0.242	0.438	0.773	1.004	1.368	1.69
	0.235	0.204	0.247	0.46	0.796	1.069	1.382	1.718
average	0.222333	0.243	0.242	0.451	0.782667	1.04367	1.387	1.71067
stdev	0.0200721	0.0294052	0.00408248	0.0094163	0.00974109	0.0284058	0.0179072	0.0148174
42-20	0.072	0.071	0.065	0.116	0.16	0.2	0.265	0.356
	0.068	0.06	0.072	0.107	0.165	0.172	0.253	0.337
	0.069	0.056	0.072	0.112	0.168	0.194	0.248	0.365
average	0.0696667	0.0623333	0.0696667	0.111667	0.164333	0.188667	0.255333	0.352667
stdev	0.00169967	0.0063421	0.00329983	0.00368179	0.00329983	0.012037	0.00713364	0.0116714
Ste7KO	OD & Time
	1	2	3	4	5	6
wt	0.304	0.36	0.466	0.627	0.756	0.904
	0.3	0.36	0.469	0.606	0.73	0.9
	0.4	0.398	0.47	0.616	0.777	0.94
average	0.334667	0.372667	0.468333	0.616333	0.754333	0.914667
stdev	0.0462265	0.0179134	0.00169967	0.00857645	0.0192238	0.0179877
Ste7KO	0.482	0.633	0.866	1.248	1.635	1.95
	0.51	0.656	0.9	1.276	1.683	1.99
	0.5	0.717	0.9	1.294	1.646	1.97
average	0.497333	0.668667	0.888667	1.27267	1.65467	1.97
stdev	0.0115854	0.0354432	0.0160278	0.0189268	0.0205318	0.0163299
5-7	0.401	0.519	0.762	1.11	1.478	1.808
	0.437	0.6	0.774	1.138	1.515	1.795
	0.533	0.6	0.778	1.138	1.543	1.79
average	0.457	0.573	0.771333	1.12867	1.512	1.79767
stdev	0.0557136	0.0381838	0.00679869	0.0131993	0.0266208	0.00758654
11-7	0.597	0.664	0.888	1.215	1.588	1.92
	0.531	0.628	0.865	1.202	1.63	1.943
	0.58	0.651	0.91	1.282	1.617	1.97
average	0.569333	0.647667	0.887667	1.233	1.61167	1.94433
stdev	0.0279802	0.0148847	0.0183727	0.0350523	0.0175563	0.0204342
50-7	0.448	0.564	0.715	1.046	1.389	1.784
	0.418	0.572	0.668	1.018	1.397	1.77
	0.454	0.53	0.758	1.049	1.472	1.78
average	0.44	0.555333	0.713667	1.03767	1.41933	1.778
stdev	0.015748	0.0182087	0.0367544	0.0139603	0.0373839	0.00588784
Ste11KO + 0.4M KCL		OD & Time
	1	2	3	4	5	6	7	8
wt	0.283	0.34	0.392	0.48	0.562	0.71	0.876	1.03
	0.27	0.322	0.4	0.494	0.574	0.681	0.86	1.041
	0.273	0.322	0.411	0.49	0.598	0.744	0.909	1.08
average	0.275333	0.328	0.401	0.488	0.578	0.711667	0.881667	1.05033
stdev	0.00555778	0.00848528	0.00778888	0.00588784	0.0149666	0.0257466	0.0204015	0.0214528
Ste11KO	0.441	0.466	0.608	0.746	0.967	1.274	1.566	1.843
	0.434	0.491	0.607	0.743	0.959	1.27	1.549	1.813
	0.414	0.462	0.616	0.778	1.005	1.282	1.6	1.89
average	0.429667	0.473	0.610333	0.755667	0.977	1.27533	1.57167	1.84867
stdev	0.0114407	0.0128323	0.00402768	0.0158395	0.0200666	0.00498888	0.0212027	0.0316895
5-11	0.443	0.451	0.555	0.711	0.915	1.197	1.5	1.769
	0.392	0.48	0.574	0.729	0.942	1.252	1.533	1.798
	0.383	0.437	0.573	0.73	0.931	1.224	1.475	1.798
average	0.406	0.456	0.567333	0.723333	0.929333	1.22433	1.50267	1.78833
stdev	0.0264197	0.0179072	0.00873053	0.00873053	0.0110855	0.0224549	0.0237534	0.0136707
20-11	0.345	0.43	0.518	0.643	0.8	1.035	1.307	1.457
	0.428	0.414	0.539	0.678	0.868	1.064	1.311	1.473
	0.346	0.414	0.533	0.629	0.834	1.064	1.318	1.41
average	0.373	0.419333	0.53	0.65	0.834	1.05433	1.312	1.44667
stdev	0.038893	0.00754247	0.00883176	0.0206074	0.0277609	0.0136707	0.00454606	0.0267374

## Sheet: Data Fig S10
Strain & Variant	Condition	Mean GFP Fluorescence
WT	w/o a-factor	2.26
	w/o a-factor	2.9
	w/ a-factor	8.18
	w/ a-factor	7.74
Ste20KO	w/o a-factor	3.67
	w/o a-factor	2.8
	w/ a-factor	3.19
	w/ a-factor	3.36
Ste5KO	w/o a-factor	2.42
	w/o a-factor	2.13
	w/ a-factor	2.24
	w/ a-factor	2.94
Ste7KO	w/o a-factor	3.47
	w/o a-factor	2.99
	w/ a-factor	3.84
	w/ a-factor	3.92
Ste11KO	w/o a-factor	3.19
	w/o a-factor	2.91
	w/ a-factor	3.16
	w/ a-factor	2.87
Ste50KO	w/o a-factor	3.71
	w/o a-factor	3.93
	w/ a-factor	2.72
	w/ a-factor	2.63
Ste20KO+Ste20N-	w/o a-factor	1.87
	w/o a-factor	2.07
	w/ a-factor	2.02
	w/ a-factor	2.72
Ste11KO+Ste11N-	w/o a-factor	3.56
	w/o a-factor	3.99
	w/ a-factor	2.37
	w/ a-factor	3.21
Ste7KO+Ste7N-	w/o a-factor	2.81
	w/o a-factor	2.57
	w/ a-factor	1.73
	w/ a-factor	1.74
Ste5KO+Ste5N-	w/o a-factor	2.15
	w/o a-factor	2.28
	w/ a-factor	2.56
	w/ a-factor	2.8
Ste50KO+Ste50N-	w/o a-factor	2.29
	w/o a-factor	2.76
	w/ a-factor	4.32
	w/ a-factor	4.47

## Sheet: Data Fig S13
Strain	Variant	Mean GFP Fluorescence
WT	GFP	9.03
		11.2
Ste7KO	GFP-5-7	1.98
		1.98
Ste11KO	GFP-5-11	4.3
		3.23
Ste20KO	GFP-5-20	3.32
		3.57
Ste7KO	GFP-50-7	6.14
		6.04
Ste50KO	GFP-50-7	5
		5.4
Ste20KO	GFP-20-11	4.09
		4
Ste11KO	GFP-20-11	4.75
		5.12
Ste50KO	GFP-50-11	4.86
		5.71
Ste11KO	GFP-50-11	5.33
		5.78
Ste18KO	GFP-42-18	4.45
		5.69
Ste20KO	GFP-11-20	4.5
		4.35
Ste11KO	GFP-11-20	3.67
		3.07
Ste50KO	GFP-50-20	2.27
		3.92
Ste20KO	GFP-50-20	1.64
		2.23
Ste50KO	GFP-50-3	1.9
		2.12
